# Supplementary material
Source: Springer Nature journal article supplement (https://www.springermedizin.de/resource/supplementary/12885_2014_4961_MOESM4_ESM.pdf/9467840)

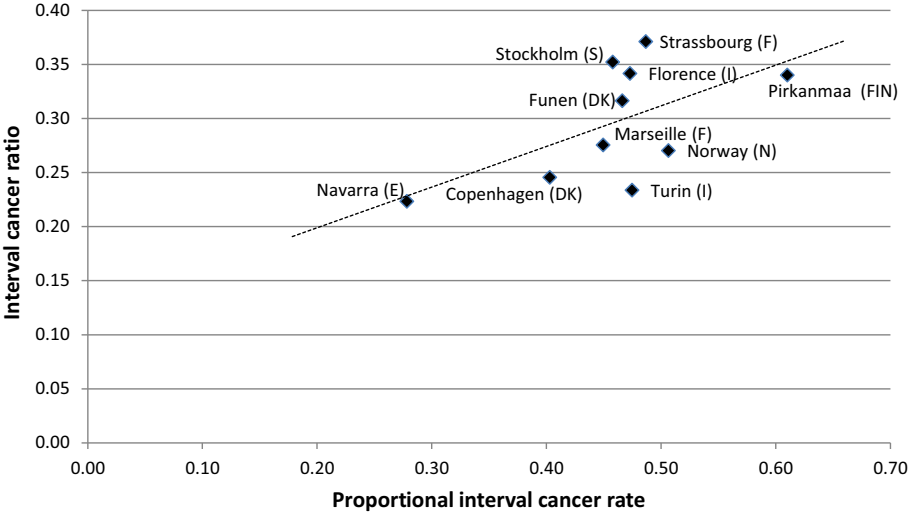

Supplement: MOESM4 [file 9467840]
